# Supplementary material
Source: PubMed Central journal article supplement (PMC4533891)

Supplemental File

**Typical examples of typical erratic and non-linear accommodation in relation to more linear vergence responses**

Titles denote age in weeks and cue condition

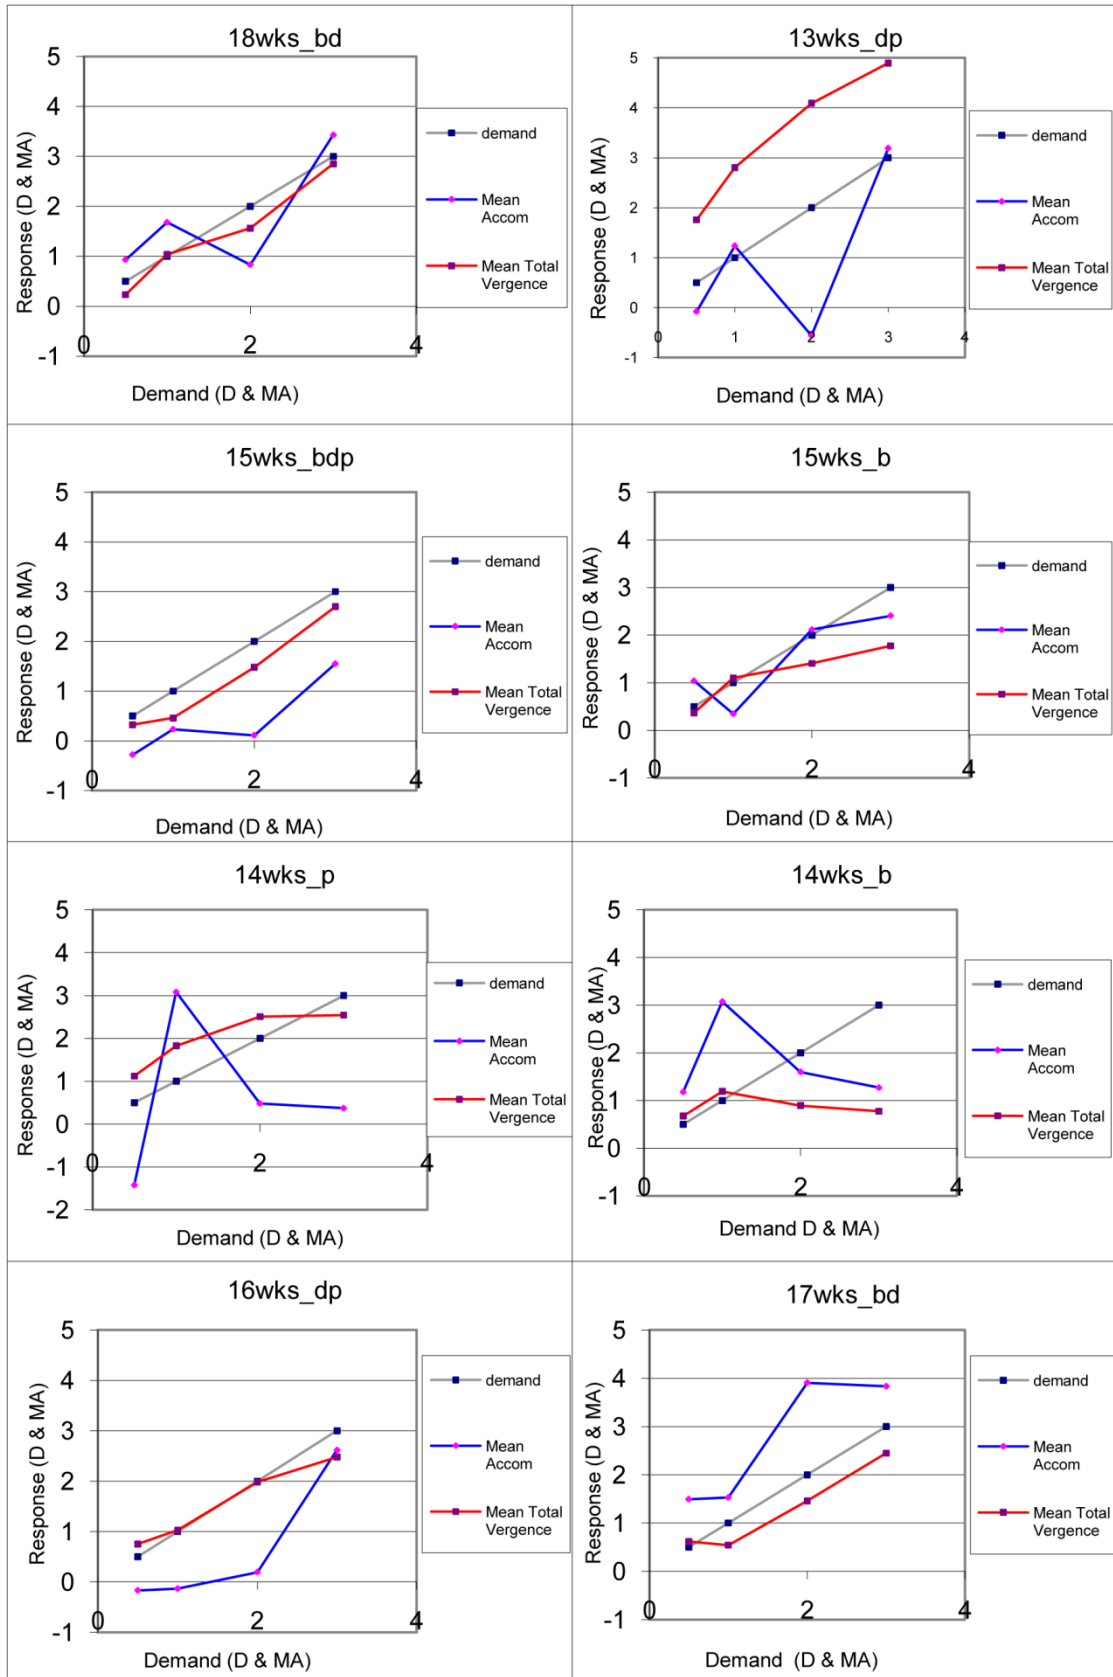

Supplement: NIHMS64609-supplement-Erratic_accom_examples.pdf [file NIHMS64609-supplement-Erratic_accom_examples.pdf]
